# Supplementary material
Source: publisher figshare collection journal article supplement (https://gsapubs.figshare.com/ndownloader/files/23313254)
Supplement: Supplementary file 1 [file 23313254]

## Sub-arc xenolith Fe-Li-Pb isotopes and textures tell tales of their journey through the mantle wedge and crust

Simon Turner, Helen Williams, Janne Blichert-Toft, Sandra Piazzolo, Mitchel Gerdes, John Adam, Xiao-Ming Liu, Bruce Schaefer and Rene Maury

**This data supplement includes Tables DR1-4 in Excel format.**

### **Analytical Methods**

Quantitative orientation analysis (Electron back-scatter diffraction) was performed at Macquarie Geoanalytical using the Carl Zeiss IVO SEM at 20kV, high vacuum and 8.0 nA. Patterns were acquired with HKL NordlysNano high sensitivity EBSD detector and indexed using AzTec analysis software (Oxford Instruments). Analyses were acquired on a raster grid with step sizes of 4-10  $\mu\text{m}$ . Post-acquisition analysis was performed using the Channel 5 software (Oxford Instruments) using a “standard” noise reduction (Piazzolo et al., 2006). Grain boundaries are defined as areas surrounded by  $10^\circ$  boundaries, while sub-grain boundaries have misorientations less than  $10^\circ$ . Mineral analyses were obtained using a Cameca SX100 with an accelerating voltage of 15 keV and a focused beam current of 20 nA. A defocused beam was used to measure the groundmass of the host lava. A counting time of 10 seconds was assigned to both peak and background measurements. Spectrometer calibration was achieved using the following standards: Jadeite (Na), Fayalite (Fe), kyanite (Al), olivine (Mg), chromite (Cr), spessartine garnet (Mn), orthoclase (K), wollastonite (Ca, Si) and  $\text{TiO}_2$  (Ti). Mineral trace element analyses were performed in situ using a Photon Machines Excite 193 Eximer laser coupled to an Agilent Technologies 7700 Series quadrupole inductively-coupled plasma mass spectrometer, Glitter software and NIST610 Glass as a calibration standard and BHVO-2G and BCR-2G as reference materials.

The whole rock isotope analyses of the harzburgites reported in Table DR1 were obtained on splits of the same powders used in Turner et al. (2012). Boron isotopic composition was determined at the Istituto di Geoscienze e Georisorse, Pisa, by the dicesium borate method using a VG Isomass 54E positive thermal ionization mass spectrometer, following separation of boron by ion-exchange procedures (Tonorini et al., 1997). Total procedural blanks (8-12 ng) are negligible relative to the amount of sample processed. Correction for isotopic fractionation associated with mass spectrometric analysis was made using a fractionation factor (including correction for  $^{17}\text{O}$

contributions), calculated as  $\{(R_{\text{cert}}+0.00079)/R_{\text{meas}}\}$ , relative to NIST SRM 951 ( $R_{\text{meas}} = {}^{11}\text{B}/{}^{10}\text{B}_{\text{meas}} = 4.0498 \pm 0.0010$ ). An aliquot of this standard was processed identically with each batch of samples. Boron isotopic composition is reported in conventional delta notation ( $\delta^{11}\text{B}$ ) as per mil (‰) deviation from the accepted composition of NIST SRM-951 ( $R_{\text{cert}} = 4.04362$ ). Long-term reproducibility of isotopically homogeneous samples treated with alkaline fusion chemistry is approximately  $\pm 0.5\text{‰}$  and replicate analyses of all samples agree within this limit. Accuracy was evaluated independently via multiple analyses of the GSJ-JB2 basalt reference standard, for which we obtained an average  $\delta^{11}\text{B}$  of  $7.13 \pm 0.19\text{‰}$  ( $2\sigma_{\text{mean}}$ ;  $n = 17$ ).

Samples (and standards) were prepared for Li isotopic analysis at the University of Maryland by digesting the powders with a 3:1 mixture of concentrated HF and HNO<sub>3</sub> in Savillex® screw top beakers on a hot plate ( $T \sim 90^\circ\text{C}$ ). This was followed by addition of HNO<sub>3</sub> and HCl, with drying between each stage of acid addition. The residue was then re-dissolved in 4 M HCl in preparation for four-column ion-exchange chromatography (Rudnick et al., 2004). For each column, 1 ml of cation exchange resin of AG50w-X12, 200-400 mesh (Bio-Rad) was cleaned with HCl and Milli-Q water followed by conditioning, chemical separation and sample collection using an eluent mixture of HCl and ethanol. The first two columns remove major element cations with 2.5M HCl and subsequently 0.15M HCl. The third and fourth columns separate Na from Li with 30% ethanol in 0.5M HCl through a N<sub>2</sub> pressurized ion exchange column (Rudnick et al., 2004). The samples were analyzed for  ${}^6\text{Li}$  and  ${}^7\text{Li}$  on a Nu Plasma multiple-collector inductively coupled plasma mass spectrometer using faraday cups. Li isotopic compositions were analyzed by bracketing the sample, before and after, with the L-SVEC standard. The  $\delta^7\text{Li}$  value ( $\delta^7\text{Li} = [({}^7\text{Li}/{}^6\text{Li})_{\text{sample}} / ({}^7\text{Li}/{}^6\text{Li})_{\text{standard}} - 1 \times 1000]$ ) is expressed as per mil deviations from the LSVEC standard. External reproducibility of the isotopic compositions is  $\leq \pm 1.0\text{‰}$  ( $2\sigma$ ) based on repeat runs of pure Li standard solutions: in-house standard UMD-1 and international standard reference material IRMM-016.

Iron isotopic analyses followed procedures described in Williams and Bizimis (2014) using a ThermoFisher Neptune multiple-collector inductively coupled plasma mass spectrometer at the University of Durham. Instrumental mass bias was corrected for by sample–standard bracketing where the sample and standard Fe beam intensities (typically 35–40V  ${}^{56}\text{Fe}$  for a standard  $10^{11}$  resistor) were matched to 5%. Mass dependence, long-term reproducibility and accuracy were evaluated by analysis of an in-house FeCl salt standard ( $\delta^{57}\text{Fe} = -1.06 \pm 0.07\text{‰}$ ;  $\delta^{56}\text{Fe} = -0.71 \pm 0.06\text{‰}$  2S.D.,  $n = 35$ ). The mean Fe isotope compositions of international rock standards BIR-1 (Icelandic basalt) and Nod-PI (Pacific ferromanganese nodule) were: BIR-1,  $\delta^{57}\text{Fe} = 0.082 \pm 0.01\text{‰}$ ;  $\delta^{56}\text{Fe} = 0.062 \pm 0.01\text{‰}$  (2S.D.,  $n = 6$ ), Nod-PI  $\delta^{57}\text{Fe} = -0.837 \pm 0.02\text{‰}$ ;  $\delta^{56}\text{Fe} = -0.569 \pm 0.03\text{‰}$  (2S.D.,  $n = 7$ ). Iron yields were quantitative and chemistry blanks were  $<0.5\text{ng}$  Fe, negligible compared to the quantities of sample Fe ( $>300\mu\text{g}$ ) processed.

71 The Pb isotope compositions were determined on bulk-rock powders by wet chemistry and a  
72 Nu Plasma 500 HR multiple-collector inductively coupled plasma mass spectrometer using Tl  
73 doping and sample–standard bracketing (Albarede et al., 2004) at the Ecole Normale Supérieure in  
74 Lyon. The whole-rock powders were leached in hot 6M HCl, including multiple ultrasonicing  
75 steps, prior to attack in a 3:1:0.5 mixture of double-distilled concentrated HF, HNO<sub>3</sub>, and HClO<sub>4</sub>.  
76 After fuming with double-distilled concentrated HClO<sub>4</sub> to eliminate fluorides from the sample  
77 digestion procedure, the samples were taken up in 6M HCl, placed on a hot plate until in complete  
78 solution, and evaporated to dryness. Lead was separated by ion-exchange chromatography on 0.5  
79 ml columns filled with Bio-Rad AG1-X8 (100–200 mesh) resin using 1M HBr to elute the sample  
80 matrix and 6M HCl to collect the Pb. The total procedural Pb blank was < 20 pg. The NIST 981 Pb  
81 standard and the values of Eisele et al. (2003) were used for bracketing the unknowns (every two  
82 samples), and added Tl was used to monitor and correct for instrumental mass bias. The external  
83 reproducibility, estimated from the repeated NIST 981 measurements, are 100-200 ppm (or 0.01-  
84 0.02 %) for ratios based on 204 (<sup>206</sup>Pb/<sup>204</sup>Pb, <sup>207</sup>Pb/<sup>204</sup>Pb, <sup>208</sup>Pb/<sup>204</sup>Pb) and 50 ppm (or 0.005 %) for  
85 <sup>207</sup>Pb/<sup>206</sup>Pb, <sup>208</sup>Pb/<sup>206</sup>Pb, and <sup>207</sup>Pb/<sup>208</sup>Pb.

86 The Re–Os methodology for the analysis in Table DR4 followed techniques described in  
87 Bezard et al. (2015). An olivine separate from a harzburgite fragment shown in Fig. 1 was spiked  
88 for Re and Os and digested in inverse aqua regia (8 ml 16M HNO<sub>3</sub>, 4 ml 12M HCl) by Carius tube  
89 dissolution followed by solvent extraction using the methods of Shirey and Walker (1995) and  
90 Cohen and Waters (1996). Rhenium was purified following Os extraction using anion exchange  
91 chromatography (Lambert et al., 1998) after back extraction in isoamylol. The osmium isotope  
92 composition was analysed in negative ion mode on a Thermo-Finnigan Triton at Macquarie  
93 University. The Os was loaded onto a Pt filament and analysed using by peak hopping for 200  
94 ratios. Rhenium was determined using a quadrupole Agilent 7500 inductively coupled plasma mass  
95 spectrometer. A Re standard solution was analysed to monitor drift and fractionation. The sample  
96 was blank-corrected using 1 pg Re and 1.15 pg Os with a <sup>187</sup>Os/<sup>188</sup>Os ratio of 0.164. Whole-rock  
97 standard (WPR-1; n=3) values in this laboratory average 10.53 ppb Re and 16.66 ppb Os with a  
98 <sup>187</sup>Os/<sup>188</sup>Os ratio of 0.14466±0.00082, reproducing accepted values (e.g., Cohen and Waters, 1996).  
99 Further discussion of standard results and reproducibility is available in Day et al. (2015).

100

### 101 **Host-melt – xenolith diffusion**

102 When plotted against the reciprocal of their elemental composition, there is no simple  
103 correlation for either δ<sup>7</sup>Li or δ<sup>57</sup>Fe as would be expected from diffusive interaction between the host  
104 magma and xenoliths (Fig. DR1).

105

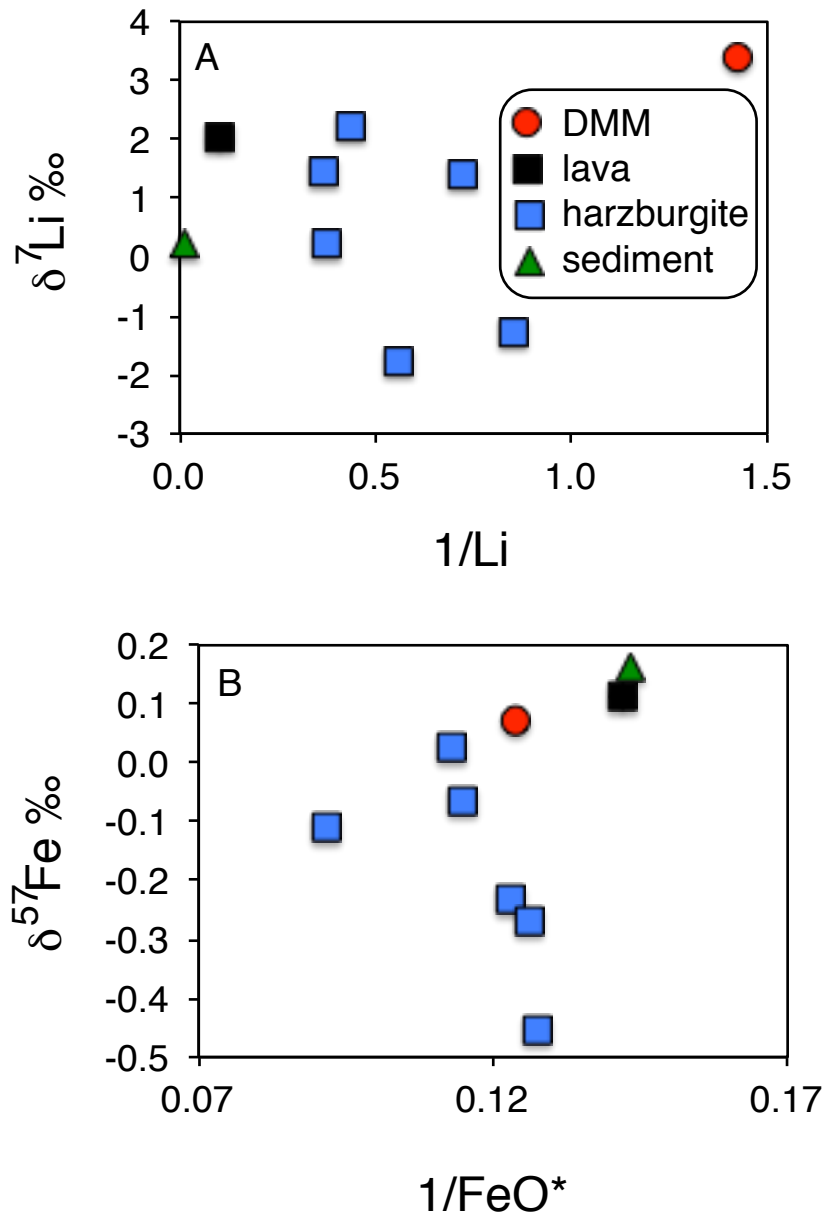

**Figure DR1. Isotope – element systematics in Batan xenoliths. A: Plot of  $\delta^7\text{Li}$  versus  $1/\text{Li}$  and B:  $\delta^{57}\text{Fe}$  versus  $1/\text{FeO}^*$  showing that there is no simple correlation as would be expected from diffusive interaction with the mantle wedge or host magma.**

#### **Li-Fe isotopic fluid-mantle wedge mixing models**

Mixing models between a slab fluid and DMM end-members ( $\delta^{57}\text{Fe} = 0.04 \text{ ‰}$ ; Williams and Bizimis 2016 and references therein) were constructed in order to evaluate if the Fe-Li stable isotope relationships (Fig. DR2) could be explained by the simple addition of an isotopically light fluid to the mantle wedge. In the absence of a direct proxy, the slab fluid component was approximated using Fe and Li concentration and isotopic data for high-temperature hydrothermal fluids vents (Fe isotopes: Rouxel et al., 2008,  $\delta^{57}\text{Fe} = -2.67 \text{ ‰}$ ,  $[\text{Fe}] = 3105 \text{ } \mu\text{M}$ ; Li isotopes: Chan

119 et al., 1993  $\delta^7\text{Li} = -6.8\text{‰}$ ,  $[\text{Li}] = 1421\text{ }\mu\text{M}$ ). The slab fluid - mantle wedge mixing model defines a  
 120 strongly curved line on Fig. DR2, as a result of the extreme contrast in Li/Fe ratios between the  
 121 fluid and mantle wedge. The contrast between the strong curvature of the mixing line and the broad  
 122 linear array of the samples serves to demonstrate that simple binary mixing cannot be the dominant  
 123 process in controlling the Li and Fe isotope systematics of the Batan xenoliths.  
 124

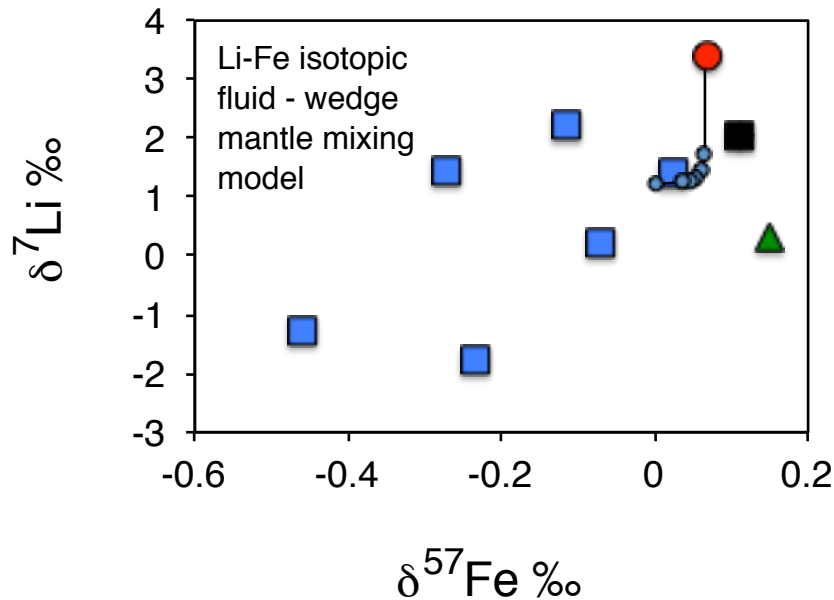

125  
 126 **Figure DR2. Plot of  $\delta^7\text{Li}$  versus  $\delta^{57}\text{Fe}$  showing weak positive correlation. Fluid – wedge**  
 127 **mixing model is strongly curved relative to the data and cannot reproduce the extent of stable**  
 128 **isotope fractionation (marks along curve indicate 10% increments of fluid addition).**

### 130 References

- 131 Albarede, F., Telouk, P., Blichert-Toft, J., Boyet, M., Agranier, A., and Nelson, B.K., 2004, Precise  
 132 and accurate isotopic measurements using multiple-collector ICPMS: *Geochimica et*  
 133 *Cosmochimica Acta*, v. 68, p. 2725–2744.
- 134 Bezard, R., Schaefer, B., Turner, S., Davidson, J.P., and Selby, D., 2015, Lower crustal assimilation  
 135 in oceanic arcs: insights from an Osmium isotope study of the Lesser Antilles: *Geochimica et*  
 136 *Cosmochimica Acta*, v. 150, p. 330–344.
- 137 Chan, L.H., Edmond, J.M., and Thompson, G., 1993, A lithium isotope study of hot springs and  
 138 metabasalts from mid-ocean ridge hydrothermal systems: *Journal of Geophysical Research*, v.  
 139 98, p. 9653–9659.
- 140 Chaussidon, M., and Marty, B., 1995, Primitive boron isotope composition of the mantle. *Science*,  
 141 v. 269, p. 383– 386.
- 142 Cohen, A.S., and Waters, F.G., 1996, Separation of osmium from geological materials by solvent

143 extraction for analysis by thermal ionisation mass spectrometry. *Analytica Chimica Acta*, v.  
144 332, p. 269–275.

145 Day, J.M.D., Waters, C.L., Schaefer, B.F., Walker, R.J., and Turner, S., 2015, Use of hydrofluoric  
146 acid desilicification in the determination of highly siderophile element abundances and Re-Os  
147 isotope systematics in mafic-ultramafic rocks: *Geostandards and Geoanalytical Research*, v.  
148 39, p. 17-30.

149 Eisele, J., Abouchami, W., Galer, S.J., and Hofmann, A.W., 2003, The 320 kyr Pb isotope evolution  
150 of Mauna Kea lavas recorded in the HSDP-2 drill core: *Geochemistry, Geophysics,*  
151 *Geosystems*, v. 4, doi:10.1029/2002GC000339.

152 Lambert, D.D., Foster, J.G., Frick, L.R., Hoatson, D.M., Purvis, A.C., 1998, Application of the Re-  
153 Os isotopic system to the study of Precambrian magmatic sulfide deposits of Western  
154 Australia: *Australian Journal of Earth Sciences*, v. 45, p. 265–284.

155 Piazzolo, S., Bestmann, M., Spiers, C., and Prior, D.J., 2006, Temperature dependent grain boundary  
156 migration mechanisms: Insights from in-situ experiments: *Tectonophysics*, v. 427, p. 55-71.

157 Rouxel, O., Shanks, W.C., Bach, W. and Edwards, K.J., 2008, Integrated Fe-and S-isotope study of  
158 seafloor hydrothermal vents at East Pacific Rise 9–10 N: *Chemical Geology*, v. 252, p. 214-  
159 227.

160 Rudnick, R.L., Tomascak, P.B., Heather, B.N., and Gardner, L.R., 2004, Extreme lithium isotopic  
161 fractionation during continental weathering revealed in saprolites from South Carolina:  
162 *Chemical Geology*, v. 212, p. 45–57.

163 Salters, V.J.M., and Stracke, A., 2004, Composition of the depleted mantle: *Geochemistry,*  
164 *Geophysics, Geosystems*, v. 5, doi:10.1029/2003GC000597.

165 Shirey, S.B., Walker, R.J., 1998, The Re-Os isotope system in cosmochemistry and high-  
166 temperature geochemistry: *Annual Review of Earth and Planetary Sciences*, v. 26, p. 423-500.

167 Stracke, A., Bizimis, M., and Salters, V.J.M., 2003, Recycling oceanic crust: quantitative  
168 constraints: *Geochemistry, Geophysics, Geosystems*, v. 4, doi:10.1029/2001GC000223.

169 Tonarini, S., Pennisi, M., and Leeman, W.P., 1997, Precise boron isotopic analysis of complex  
170 silicate (rock) samples using alkali carbonate fusion and ion exchange separation: *Chemical*  
171 *Geology*, v. 142, p. 129-137.

172 Turner, S., Caulfield, J., Turner, M., van Keken, P., Maury, R., Sandiford, M., and Prouteau, G.,  
173 2012, Recent contribution of sediments and fluids to the mantle’s volatile budget: *Nature*  
174 *Geoscience*, v. 5, p. 50–54.

175 Williams, H., and Bizimis, M., 2014, Iron isotope tracing of mantle heterogeneity within the source  
176 regions of oceanic basalts: *Earth and Planetary Science Letters*, v. 404, p. 396–407.

Figure DR1

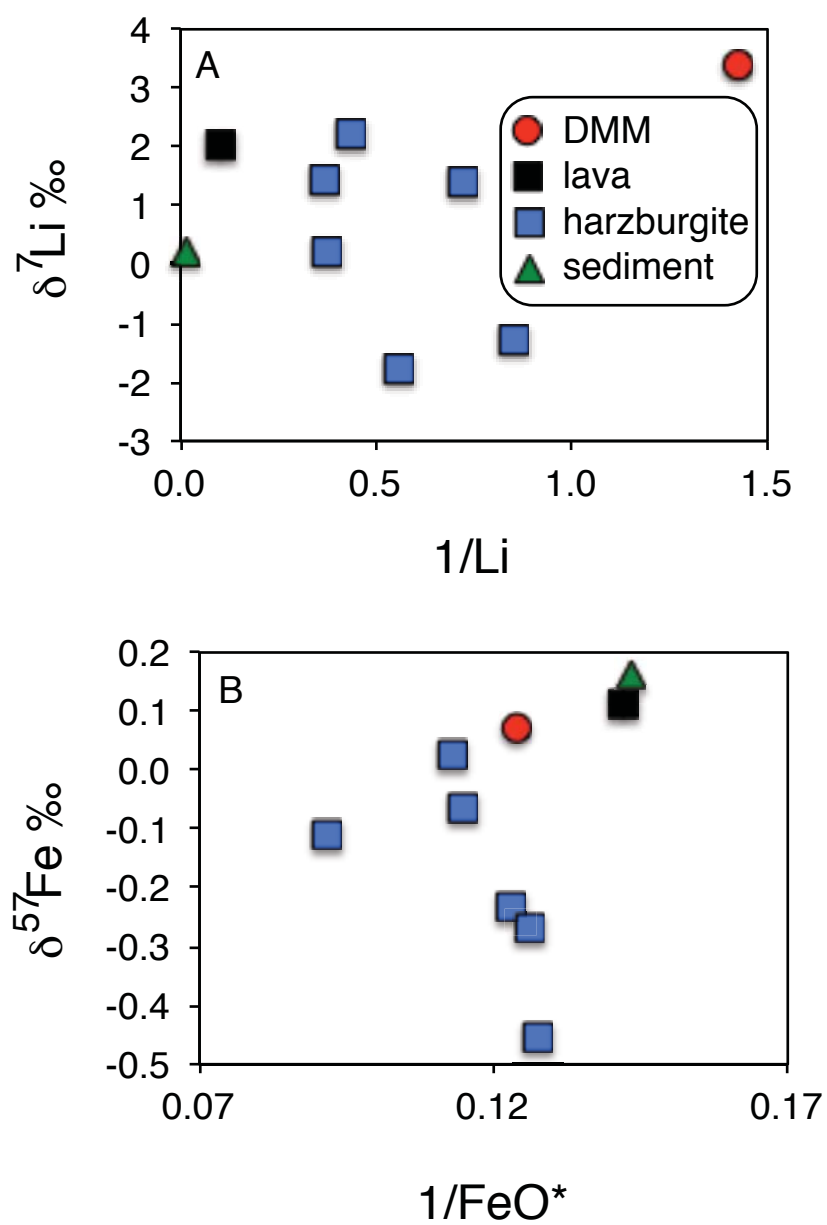

Figure DR2

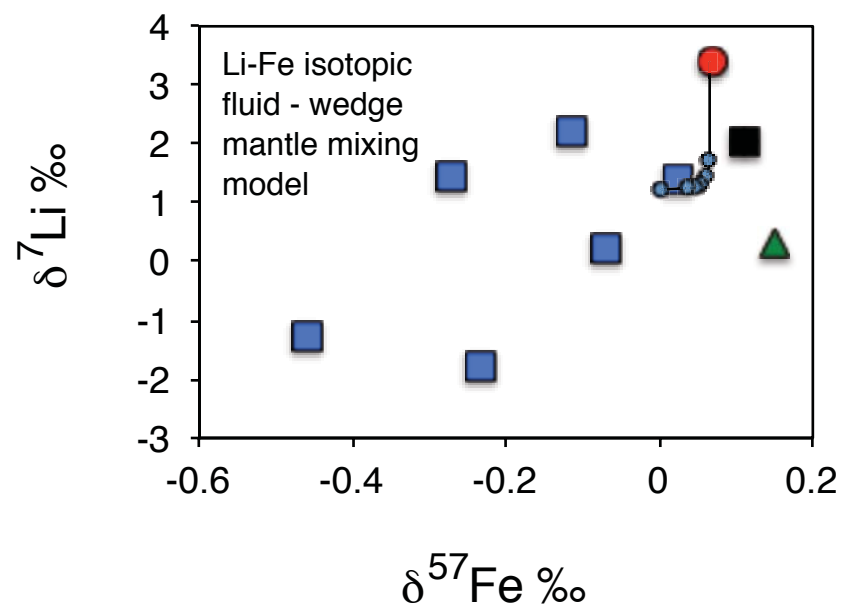



Table DR1. Elemental and isotope compositions of the Batan Island host lava, mantle xenoliths, sediment and unmodified mantle

| Sample #  | Rock Type   | B (ppm) | $\delta^{11}\text{B}$ ‰ | Li (ppm) | $\delta^7\text{Li}$ ‰ | FeO*  | $\delta^{57}\text{Fe}$ ‰ | Pb (ppm) | $^{206}\text{Pb}/^{204}\text{Pb}$ | $^{207}\text{Pb}/^{204}\text{Pb}$ | $^{208}\text{Pb}/^{204}\text{Pb}$ | $^{87}\text{Sr}/^{86}\text{Sr}$ |
|-----------|-------------|---------|-------------------------|----------|-----------------------|-------|--------------------------|----------|-----------------------------------|-----------------------------------|-----------------------------------|---------------------------------|
| Song 24b  | host lava   | 30.5    | -5.65                   | 9.43     | 2.01                  | 7.03  | 0.11                     | 13.64    | 18.435                            | 15.620                            | 38.749                            | <i>0.704450</i>                 |
| Song 24b  | harzburgite | n/d     | n/d                     | 1.77     | 2.22                  | 8.11  | -0.11                    | 0.73     | 18.384                            | 15.602                            | 38.658                            | <i>0.704512</i>                 |
| Song 24a  | harzburgite | n/d     | n/d                     | 2.29     | 0.19                  | 10.89 | -0.07                    | 0.26     | 18.431                            | 15.699                            | 38.477                            | <i>0.706661</i>                 |
| Song 3a   | harzburgite | 5.2     | n/d                     | 2.65     | -1.30                 | 8.69  | -0.46                    | 0.49     | 18.451                            | 15.631                            | 38.724                            | <i>0.704685</i>                 |
| Basco 17b | harzburgite | n/d     | n/d                     | 1.17     | 1.42                  | 7.84  | -0.27                    | 0.15     | 18.374                            | 15.628                            | 38.640                            | <i>0.704875</i>                 |
| Balu 8    | harzburgite | 3.2     | n/d                     | 2.72     | -1.78                 | 7.92  | -0.23                    | 0.53     | 18.496                            | 15.722                            | 38.501                            | <i>0.707751</i>                 |
| B103      | harzburgite | n/d     | n/d                     | 1.38     | 1.38                  | 8.83  | 0.03                     | 0.39     | n/d                               | n/d                               | n/d                               | <i>0.704880</i>                 |
| RC17-159  | sediment    | n/d     | -0.5                    | 55.3     | 0.22                  | 6.97  | 0.16 <sup>†</sup>        | 24.20    | 18.868                            | 15.682                            | 38.276                            | <i>0.712070</i>                 |
| DMM       | lherzolite  | 0.06    | -5                      | 0.7      | 3.4                   | 8.07  | 0.07                     | 0.023    | 18.018                            | 15.486                            | 37.903                            | 0.703131                        |

Depleted MORB mantle (DMM) based on Salters and Stracke (2004); Chaussidon and Marty (1995), Stracke et al. (2003);

Elliott et al. (2004) and Williams and Bizimis (2014)

\*total iron in wt. %; n/d = not determined, <sup>†</sup>estimated terigenous composition based on MORB

Sr isotope data in italics taken from Turner et al. (2012)

Table DR2. Representative major element analyses of minerals within the xenolith and host lava shown in Fig. 2, plus the groundmass of the lava

| Component<br>Component         | harzburgite<br>olivine | harzburgite<br>orthopyroxene | harzburgite<br>clinopyroxene | harzburgite<br>Cr-spinel | hornblendite<br>pargasite | gabbro<br>pargasite | gabbro<br>plagioclase | host lava<br>orthopyroxene | host lava<br>clinopyroxene | host lava<br>plagioclase | host lava<br>groundmass |
|--------------------------------|------------------------|------------------------------|------------------------------|--------------------------|---------------------------|---------------------|-----------------------|----------------------------|----------------------------|--------------------------|-------------------------|
| SiO <sub>2</sub> (wt. %)       | 39.33                  | 56.44                        | 52.18                        | 0.04                     | 40.82                     | 40.53               | 44.50                 | 54.02                      | 50.39                      | 48.21                    | 58.53                   |
| TiO <sub>2</sub>               | 0.00                   | 0.04                         | 0.20                         | 0.00                     | 1.97                      | 2.20                | 0.00                  | 0.26                       | 0.48                       | 0.00                     | 0.22                    |
| Al <sub>2</sub> O <sub>3</sub> | 0.00                   | 1.11                         | 2.49                         | 25.16                    | 13.65                     | 13.52               | 34.40                 | 1.58                       | 3.79                       | 32.57                    | 20.29                   |
| FeO                            | 17.27                  | 11.46                        | 4.33                         | 19.64                    | 5.57                      | 6.27                | 0.57                  | 17.51                      | 4.53                       | 0.75                     | 4.02                    |
| Cr <sub>2</sub> O <sub>3</sub> | 0.02                   | 0.07                         | 0.49                         | 41.71                    | 0.00                      | 0.00                | 0.00                  | 0.00                       | 0.00                       | 0.00                     | 0.00                    |
| Fe <sub>2</sub> O <sub>3</sub> | 0.00                   | 0.00                         | 0.48                         | 0.00                     | 6.18                      | 5.47                | 0.00                  | 0.20                       | 3.80                       | 0.00                     | 0.00                    |
| MnO                            | 0.39                   | 0.38                         | 0.17                         | 0.07                     | 0.14                      | 0.14                | 0.00                  | 0.48                       | 0.19                       | 0.00                     | 0.12                    |
| MgO                            | 43.03                  | 30.28                        | 15.85                        | 13.22                    | 15.11                     | 14.96               | 0.03                  | 24.92                      | 15.69                      | 0.06                     | 2.32                    |
| CaO                            | 0.12                   | 1.18                         | 22.70                        | 0.00                     | 12.38                     | 12.40               | 19.10                 | 1.89                       | 21.03                      | 16.55                    | 8.37                    |
| Na <sub>2</sub> O              | 0.03                   | 0.01                         | 0.26                         | 0.00                     | 2.36                      | 2.14                | 0.76                  | 0.00                       | 0.22                       | 2.39                     | 4.83                    |
| K <sub>2</sub> O               | 0.00                   | 0.00                         | 0.01                         | 0.00                     | 0.97                      | 1.17                | 0.03                  | 0.00                       | 0.00                       | 0.08                     | 1.15                    |
| NiO                            | 0.30                   | 0.05                         | 0.00                         | 0.12                     | 0.00                      | 0.00                | 0.00                  | 0.00                       | 0.00                       | 0.00                     | 0.00                    |
| Total                          | 100.49                 | 101.02                       | 99.16                        | 99.96                    | 99.15                     | 98.80               | 99.39                 | 100.86                     | 100.12                     | 100.61                   | 99.85                   |

Table DR3. Representative trace element analyses of minerals within the xenolith shown in Fig. 2

| Component<br>Mineral | harzburgite<br>olivine | harzburgite<br>orthopyroxene | harzburgite<br>clinopyroxene | hornblendite<br>hornblende | gabbro<br>hornblende | gabbro<br>plagioclase |
|----------------------|------------------------|------------------------------|------------------------------|----------------------------|----------------------|-----------------------|
| Li (ppm)             | 3.2                    | 1.3                          | 1.67                         | 1.3                        | 1.18                 | 0.48                  |
| Be                   | <0.073                 | <0.063                       | 0.109                        | 0.412                      | 0.573                | 0.38                  |
| B                    | <1                     | 5.12                         | 4.75                         | 5.39                       | 3.17                 | 4.42                  |
| Sc                   | 7.03                   | 12.09                        | 83.3                         | 100.28                     | 106.18               | 1.618                 |
| V                    | 3                      | 34.25                        | 182.46                       | 500.03                     | 572.27               | 7.98                  |
| Cr                   | 3                      | 1189.47                      | 6616.84                      | 230.16                     | 188.82               | <0.99                 |
| Co                   | 186                    | 61.09                        | 24.5                         | 50.58                      | 56.02                | 0.827                 |
| Ni                   | 2210                   | 544.43                       | 299.72                       | 303.45                     | 205                  | 1.28                  |
| Cu                   | 5.92                   | 1.25                         | 5.14                         | 2.68                       | 2.64                 | 2.69                  |
| Zn                   | 157                    | 104.59                       | 26.95                        | 47.61                      | 58.07                | 5.67                  |
| Ga                   | 0.3                    | 2.209                        | 3.61                         | 27.91                      | 26.44                | 23.44                 |
| Rb                   | 0.13                   | <0.055                       | 0.079                        | 9.44                       | 7.37                 | 3.43                  |
| Sr                   | 0.091                  | 0.123                        | 49.81                        | 393.66                     | 362.17               | 1135.88               |
| Y                    | 0.071                  | 0.824                        | 10.95                        | 17.71                      | 16.92                | 0.547                 |
| Zr                   | 0.17                   | 0.642                        | 18.32                        | 50.47                      | 39.11                | 4.77                  |
| Nb                   | 0.1                    | <0.0086                      | 0.0219                       | 3.25                       | 2.29                 | 0.322                 |
| Cs                   | 0.07                   | <0.0231                      | <0.029                       | 0.217                      | 0.028                | 0.261                 |
| Ba                   | 0.5                    | <0.0178                      | 0.137                        | 253.4                      | 266.26               | 69.92                 |
| La                   | 0.06                   | <0.0105                      | 2.001                        | 4.63                       | 5.03                 | 2.91                  |
| Ce                   | 0.05                   | 0.0304                       | 9.01                         | 17.35                      | 18.28                | 5.47                  |
| Pr                   | 0.05                   | <0.0041                      | 1.942                        | 3.21                       | 3.13                 | 0.613                 |
| Nd                   | 0.32                   | 0.088                        | 12                           | 18.02                      | 16.61                | 1.88                  |
| Sm                   | 0.3                    | 0.053                        | 3.2                          | 4.96                       | 4.42                 | 0.355                 |
| Eu                   | 0.09                   | 0.0139                       | 0.738                        | 1.383                      | 1.4                  | 0.286                 |
| Gd                   | 0.3                    | 0.094                        | 2.64                         | 4.18                       | 3.76                 | 0.142                 |
| Tb                   | 0.04                   | 0.0156                       | 0.354                        | 0.599                      | 0.537                | 0.0165                |
| Dy                   | 0.3                    | 0.121                        | 2.3                          | 3.74                       | 3.25                 | 0.11                  |
| Ho                   | 0.05                   | 0.0408                       | 0.427                        | 0.737                      | 0.704                | 0.0229                |
| Er                   | 0.2                    | 0.129                        | 1.183                        | 1.817                      | 1.79                 | 0.043                 |
| Tm                   | 0.06                   | 0.0283                       | 0.165                        | 0.241                      | 0.229                | <0.0093               |
| Yb                   | 0.34                   | 0.161                        | 0.93                         | 1.488                      | 1.479                | 0.038                 |
| Lu                   | 0.06                   | 0.0192                       | 0.133                        | 0.228                      | 0.206                | 0.0162                |
| Hf                   | 0.17                   | 0.038                        | 1.422                        | 2.098                      | 1.539                | 0.103                 |
| Ta                   | <0.07                  | <0.0054                      | 0.0059                       | 0.1402                     | 0.0967               | 0.0087                |
| Pb                   | 0.21                   | <0.033                       | 0.12                         | 1.618                      | 1.425                | 1.465                 |
| Th                   | 0.05                   | <0.0065                      | 0.0789                       | 0.577                      | 0.322                | 0.53                  |
| U                    | 0.05                   | <0.0058                      | 0.01                         | 0.1093                     | 0.0374               | 0.112                 |

Table DR4. Re-Os isotope data for olivine from a harzburgite fragment

| Re (ppb) | $2\sigma$ | Os (ppb) | $2\sigma$ | $^{187}\text{Re}/^{188}\text{Os}$ | $2\sigma$ | $^{187}\text{Os}/^{188}\text{Os}$ | $2\sigma$ |
|----------|-----------|----------|-----------|-----------------------------------|-----------|-----------------------------------|-----------|
| 0.944    | 0.014     | 1.5713   | 0.0009    | 22.890                            | 0.144     | 0.12660                           | 0.0001    |
